# Supplementary material
Source: publisher figshare collection journal article supplement (https://gsajournals.figshare.com/ndownloader/files/14394620)
Supplement: Supplementary file 1 [file 14394620]

## Sheet: Sheet1
Supplemental Table 2. Bioinformatic data for individual mosquito tissue small RNA-Seq libraries
					20-24nt size small RNAs
Library	Total Number of Reads	Number of Reads Post Trim	Total Number of Reads Post Trim and 20-24nt size filteredd	Mapping percentage	Number of Multi-mapping Reads	Number of Unannotated Reads	Number of Annotated Reads
FatBody-Ab biorep1	12366207	11572930	1741604	99.72	439441	92196	1209967
FatBody-Ab biorep2	12779409	12209999	1838414	99.75	547978	75642	1214794
FatBody-Ab biorep3	11837073	11250531	2304788	99.72	540551	93998	1670239
Midgut biorep1	11193030	10755406	4354913	99.74	1565655	100000	2689258
Midgut biorep2	13047301	12316222	2541077	99.44	982996	89084	1468997
Midgut biorep3	12625798	11918253	2495339	99.55	1267100	78830	1149409
Ovary biorep1	12344470	12115846	473050	99.61	167278	63973	241799
Ovary biorep2	12445075	12097078	414093	99.6	148895	50241	214957
Ovary biorep3	11731424	11510877	378503	99.58	145527	51466	181510
Remainder biorep1	13236097	12225421	1290962	99.66	723798	76458	490706
Remainder biorep2	12316691	11531060	859297	99.61	586749	50735	221813
Remainder biorep3	12300096	11797096	1431511	99.65	1167272	69242	194997
